# Supplementary material for: Urine proteomics for discovery of improved diagnostic markers of Kawasaki disease
Source: PubMed Central journal article supplement (PMC3569638; doi:10.1002/emmm.201201494), 2012-12-20

# **Supplementary Information for Kentsis et al. Urine proteomics for discovery of improved diagnostic markers of Kawasaki disease**

## **Table of contents**

|                                                                                                                                             |    |
|---------------------------------------------------------------------------------------------------------------------------------------------|----|
| Supp. Table 1: Proteins identified uniquely in the urine of patients with Kawasaki disease .....                                            | 2  |
| Supp. Table 2: Processed proteomics data. ....                                                                                              | 10 |
| Supp. Table 3: Meprin A and Filamin C are significantly elevated in urine of patients with KD..                                             | 11 |
| Supp. Table 4: Meprin A and Filamin C are significantly elevated in serum of patients with KD                                               | 11 |
| Supp. Fig. 1: Urine protein concentration (top) and creatinine concentration (bottom) in patients with and without KD. ....                 | 12 |
| Supp. Fig. 2: Urine meprin A levels in KD patients with and without pyuria. ....                                                            | 13 |
| Supp. Fig. 3: Urine filamin C levels in patients suspected of Kawasaki disease as a function of their C-reactive protein levels. ....       | 14 |
| Supp. Fig. 4: Urine meprin A levels in patients suspected of Kawasaki disease as a function of their C-reactive protein levels. ....        | 15 |
| Supp. Fig. 5: Urine filamin C levels in patients suspected of Kawasaki disease as a function of their erythrocyte sedimentation rates. .... | 16 |

## Supp. Table 1: Proteins identified uniquely in the urine of patients with Kawasaki disease

| IPI ID      | UniProt/SwissProt ID | HGNC symbol | Description                                                                                                                                         |
|-------------|----------------------|-------------|-----------------------------------------------------------------------------------------------------------------------------------------------------|
| IPI00062003 |                      | ACAT1       | acetyl-CoA acetyltransferase 1 [Source:HGNC Symbol;Acc:93]                                                                                          |
| IPI00414057 |                      | ACTA1       | actin, alpha 1, skeletal muscle [Source:HGNC Symbol;Acc:129]                                                                                        |
| IPI00759776 |                      | ACTN1       | actinin, alpha 1 [Source:HGNC Symbol;Acc:163]                                                                                                       |
| IPI00019884 | ACTN2_HUMAN          | ACTN2       | actinin, alpha 2 [Source:HGNC Symbol;Acc:164]                                                                                                       |
| IPI00183703 |                      | AMICA1      | adhesion molecule, interacts with CXADR antigen 1 [Source:HGNC Symbol;Acc:19084]                                                                    |
| IPI00020019 | ADIPO_HUMAN          | ADIPOQ      | adiponectin, C1Q and collagen domain containing [Source:HGNC Symbol;Acc:13633]                                                                      |
| IPI00029733 | AK1C1_HUMAN          | AKR1C1      | aldo-keto reductase family 1, member C1 (dihydrodiol dehydrogenase 1; 20-alpha (3-alpha)-hydroxysteroid dehydrogenase) [Source:HGNC Symbol;Acc:384] |
| IPI00293721 | ARK73_HUMAN          | AKR7A3      | aldo-keto reductase family 7, member A3 (aflatoxin aldehyde reductase) [Source:HGNC Symbol;Acc:390]                                                 |
| IPI00298622 | PPBI_HUMAN           | ALPI        | alkaline phosphatase, intestinal [Source:HGNC Symbol;Acc:437]                                                                                       |
| IPI00816309 | ZA2G_HUMAN           | AZGP1       | alpha-2-glycoprotein 1, zinc-binding [Source:HGNC Symbol;Acc:910]                                                                                   |
| IPI00042580 | APOO_HUMAN           | APOO        | apolipoprotein O [Source:HGNC Symbol;Acc:28727]                                                                                                     |
| IPI00007068 | ARP3B_HUMAN          | ACTR3B      | ARP3 actin-related protein 3 homolog B (yeast) [Source:HGNC Symbol;Acc:17256]                                                                       |
| IPI00298306 | ATM_HUMAN            | ATM         | ataxia telangiectasia mutated [Source:HGNC Symbol;Acc:795]                                                                                          |
| IPI00186972 |                      | AGBL5       | ATP/GTP binding protein-like 5 [Source:HGNC Symbol;Acc:26147]                                                                                       |
| IPI00302644 |                      | ATP6V1C2    | ATPase, H <sup>+</sup> transporting, lysosomal 42kDa, V1 subunit C2 [Source:HGNC Symbol;Acc:18264]                                                  |
| IPI00003021 | AT1A2_HUMAN          | ATP1A2      | ATPase, Na <sup>+</sup> /K <sup>+</sup> transporting, alpha 2 polypeptide [Source:HGNC Symbol;Acc:800]                                              |
| IPI00293460 | ABCA1_HUMAN          | ABCA1       | ATP-binding cassette, sub-family A (ABC1), member 1 [Source:HGNC Symbol;Acc:29]                                                                     |
| IPI00019906 |                      | BSG         | basigin (Ok blood group) [Source:HGNC Symbol;Acc:1116]                                                                                              |
| IPI00744685 |                      | BTD         | biotinidase [Source:HGNC Symbol;Acc:1122]                                                                                                           |
| IPI00254408 |                      | BPTF        | bromodomain PHD finger transcription factor [Source:HGNC Symbol;Acc:3581]                                                                           |
| IPI00290089 | CAD17_HUMAN          | CDH17       | cadherin 17, LI cadherin (liver-intestine) [Source:HGNC Symbol;Acc:1756]                                                                            |
| IPI00020599 | CALR_HUMAN           | CALR        | calreticulin [Source:HGNC Symbol;Acc:1455]                                                                                                          |
| IPI00026185 | CAPZB_HUMAN          | CAPZB       | capping protein (actin filament) muscle Z-line, beta [Source:HGNC Symbol;Acc:1491]                                                                  |
| IPI00009823 | CBPA1_HUMAN          | CPA1        | carboxypeptidase A1 (pancreatic) [Source:HGNC                                                                                                       |

|             |             |           |                                                                                                                               |
|-------------|-------------|-----------|-------------------------------------------------------------------------------------------------------------------------------|
| IPI00009826 | CBPB1_HUMAN | CPB1      | Symbol;Acc:2296]<br>carboxypeptidase B1 (tissue) [Source:HGNC Symbol;Acc:2299]                                                |
| IPI00385428 |             | CEACAM1   | carcinoembryonic antigen-related cell adhesion molecule 1 (biliary glycoprotein) [Source:HGNC Symbol;Acc:1814]                |
| IPI00027412 | CEAM6_HUMAN | CEACAM6   | carcinoembryonic antigen-related cell adhesion molecule 6 (non-specific cross reacting antigen) [Source:HGNC Symbol;Acc:1818] |
| IPI00658053 | CATD_HUMAN  | CTSD      | cathepsin D [Source:HGNC Symbol;Acc:2529]                                                                                     |
| IPI00299150 | CATS_HUMAN  | CTSS      | cathepsin S [Source:HGNC Symbol;Acc:2545]                                                                                     |
| IPI00385291 |             | CD82      | CD82 molecule [Source:HGNC Symbol;Acc:6210]                                                                                   |
| IPI00477763 | MRCKB_HUMAN | CDC42BP B | CDC42 binding protein kinase beta (DMPK-like) [Source:HGNC Symbol;Acc:1738]                                                   |
| IPI00009619 |             | CADM3     | cell adhesion molecule 3 [Source:HGNC Symbol;Acc:17601]                                                                       |
| IPI00413781 |             | CXCL12    | chemokine (C-X-C motif) ligand 12 [Source:HGNC Symbol;Acc:10672]                                                              |
| IPI00014625 | CLCA1_HUMAN | CLCA1     | chloride channel accessory 1 [Source:HGNC Symbol;Acc:2015]                                                                    |
| IPI00298082 | CLCA4_HUMAN | CLCA4     | chloride channel accessory 4 [Source:HGNC Symbol;Acc:2018]                                                                    |
| IPI00307485 | CEL3B_HUMAN | CELA3B    | chymotrypsin-like elastase family, member 3B [Source:HGNC Symbol;Acc:15945]                                                   |
| IPI00642792 | CNDP2_HUMAN | CNDP2     | CNDP dipeptidase 2 (metallopeptidase M20 family) [Source:HGNC Symbol;Acc:24437]                                               |
| IPI00413344 | COF2_HUMAN  | CFL2      | cofilin 2 (muscle) [Source:HGNC Symbol;Acc:1875]                                                                              |
| IPI00743696 | CO4A1_HUMAN | COL4A1    | collagen, type IV, alpha 1 [Source:HGNC Symbol;Acc:2202]                                                                      |
| IPI00021715 | CO4A5_HUMAN | COL4A5    | collagen, type IV, alpha 5 [Source:HGNC Symbol;Acc:2207]                                                                      |
| IPI00329573 | COCA1_HUMAN | COL12A1   | collagen, type XII, alpha 1 [Source:HGNC Symbol;Acc:2188]                                                                     |
| IPI00472110 | CR1L_HUMAN  | CR1L      | complement component (3b/4b) receptor 1-like [Source:HGNC Symbol;Acc:2335]                                                    |
| IPI00332395 | CPNE9_HUMAN | CPNE9     | copine family member IX [Source:HGNC Symbol;Acc:24336]                                                                        |
| IPI00002657 | CPNE7_HUMAN | CPNE7     | copine VII [Source:HGNC Symbol;Acc:2320]                                                                                      |
| IPI00377041 | CSMD3_HUMAN | CSMD3     | CUB and Sushi multiple domains 3 [Source:HGNC Symbol;Acc:19291]                                                               |
| IPI00249672 | CUZD1_HUMAN | CUZD1     | CUB and zona pellucida-like domains 1 [Source:HGNC Symbol;Acc:17937]                                                          |
| IPI00216569 | CYTF_HUMAN  | CST7      | cystatin F (leukocystatin) [Source:HGNC Symbol;Acc:2479]                                                                      |
| IPI00176698 | CYC_HUMAN   | CYCS      | cytochrome c, somatic [Source:HGNC Symbol;Acc:19986]                                                                          |
| IPI00071824 | CKAP2_HUMAN | CKAP2     | cytoskeleton associated protein 2 [Source:HGNC Symbol;Acc:1990]                                                               |
| IPI00376377 | DHRS2_HUMAN | DHRS2     | dehydrogenase/reductase (SDR family) member 2 [Source:HGNC Symbol;Acc:18349]                                                  |
| IPI00418512 | DMBT1_HUMAN | DMBT1     | deleted in malignant brain tumors 1 [Source:HGNC Symbol;Acc:2926]                                                             |

|             |             |          |                                                                                                   |
|-------------|-------------|----------|---------------------------------------------------------------------------------------------------|
| IPI00028931 | DSG2_HUMAN  | DSG2     | desmoglein 2 [Source:HGNC Symbol;Acc:3049]                                                        |
| IPI00007249 | ENPP4_HUMAN | ENPP4    | ectonucleotide<br>pyrophosphatase/phosphodiesterase 4 (putative)<br>[Source:HGNC Symbol;Acc:3359] |
| IPI00006690 | PERE_HUMAN  | EPX      | eosinophil peroxidase [Source:HGNC<br>Symbol;Acc:3423]                                            |
| IPI00419721 | EPMIP_HUMAN | EPM2AIP1 | EPM2A (laforin) interacting protein 1<br>[Source:HGNC Symbol;Acc:19735]                           |
| IPI00376221 | E41L5_HUMAN | EPB41L5  | erythrocyte membrane protein band 4.1 like 5<br>[Source:HGNC Symbol;Acc:19819]                    |
| IPI00025491 | IF4A1_HUMAN | EIF4A1   | eukaryotic translation initiation factor 4A1<br>[Source:HGNC Symbol;Acc:3282]                     |
| IPI00010105 | IF6_HUMAN   | EIF6     | eukaryotic translation initiation factor 6<br>[Source:HGNC Symbol;Acc:6159]                       |
| IPI00064917 |             | FAM151A  | family with sequence similarity 151, member A<br>[Source:HGNC Symbol;Acc:25032]                   |
| IPI00554521 | FRIH_HUMAN  | FTH1     | ferritin, heavy polypeptide 1 [Source:HGNC<br>Symbol;Acc:3976]                                    |
| IPI00339224 |             | FN1      | fibronectin 1 [Source:HGNC Symbol;Acc:3778]                                                       |
| IPI00289334 | FLNB_HUMAN  | FLNB     | filamin B, beta [Source:HGNC Symbol;Acc:3755]                                                     |
| IPI00178352 | FLNC_HUMAN  | FLNC     | filamin C, gamma [Source:HGNC<br>Symbol;Acc:3756]                                                 |
| IPI00031708 | FAAA_HUMAN  | FAH      | fumarylacetoacetate hydrolase<br>(fumarylacetoacetase) [Source:HGNC<br>Symbol;Acc:3579]           |
| IPI00298383 |             | FXD2     | FXD domain containing ion transport regulator 2<br>[Source:HGNC Symbol;Acc:4026]                  |
| IPI00019383 | GALK1_HUMAN | GALK1    | galactokinase 1 [Source:HGNC Symbol;Acc:4118]                                                     |
| IPI00441550 |             | GLB1     | galactosidase, beta 1 [Source:HGNC<br>Symbol;Acc:4298]                                            |
| IPI00098026 |             | GGT1     | gamma-glutamyltransferase 1 [Source:HGNC<br>Symbol;Acc:4250]                                      |
| IPI00018169 | IF_HUMAN    | GIF      | gastric intrinsic factor (vitamin B synthesis)<br>[Source:HGNC Symbol;Acc:4268]                   |
| IPI00513929 |             | GDI2     | GDP dissociation inhibitor 2 [Source:HGNC<br>Symbol;Acc:4227]                                     |
| IPI00003929 | GSTA3_HUMAN | GSTA3    | glutathione S-transferase alpha 3 [Source:HGNC<br>Symbol;Acc:4628]                                |
| IPI00639805 |             | GSTM2    | glutathione S-transferase mu 2 (muscle)<br>[Source:HGNC Symbol;Acc:4634]                          |
| IPI00795622 |             | GAPDH    | glyceraldehyde-3-phosphate dehydrogenase<br>[Source:HGNC Symbol;Acc:4141]                         |
| IPI00470823 | GP2_HUMAN   | GP2      | glycoprotein 2 (zymogen granule membrane)<br>[Source:HGNC Symbol;Acc:4441]                        |
| IPI00640867 |             | GNAS     | GNAS complex locus [Source:HGNC<br>Symbol;Acc:4392]                                               |
| IPI00306543 | GDF15_HUMAN | GDF15    | growth differentiation factor 15 [Source:HGNC<br>Symbol;Acc:30142]                                |
| IPI00249267 | H2AZ_HUMAN  | H2AFZ    | H2A histone family, member Z [Source:HGNC<br>Symbol;Acc:4741]                                     |
| IPI00419884 | H3C_HUMAN   | H3F3C    | H3 histone, family 3C [Source:HGNC<br>Symbol;Acc:33164]                                           |
| IPI00009931 | HDHD3_HUMAN | HDHD3    | haloacid dehalogenase-like hydrolase domain<br>containing 3 [Source:HGNC Symbol;Acc:28171]        |

|             |             |          |                                                                                                  |
|-------------|-------------|----------|--------------------------------------------------------------------------------------------------|
| IPI00657660 |             | HBD      | hemoglobin, delta [Source:HGNC Symbol;Acc:4829]                                                  |
| IPI00641229 | IGHA2_HUMAN | IGHA2    | immunoglobulin heavy constant alpha 2 (A2m marker) [Source:HGNC Symbol;Acc:5479]                 |
| IPI00553092 |             | IGLV7-46 | immunoglobulin lambda variable 7-46 (gene/pseudogene) [Source:HGNC Symbol;Acc:5930]              |
| IPI00103356 |             | ITGB2    | integrin, beta 2 (complement component 3 receptor 3 and 4 subunit) [Source:HGNC Symbol;Acc:6155] |
| IPI00103436 | ITLN2_HUMAN | ITLN2    | intelectin 2 [Source:HGNC Symbol;Acc:20599]                                                      |
| IPI00011692 | INVO_HUMAN  | IVL      | involucrin [Source:HGNC Symbol;Acc:6187]                                                         |
| IPI00166646 | JPH3_HUMAN  | JPH3     | junctophilin 3 [Source:HGNC Symbol;Acc:14203]                                                    |
| IPI00001639 | IMB1_HUMAN  | KPNB1    | karyopherin (importin) beta 1 [Source:HGNC Symbol;Acc:6400]                                      |
| IPI00216136 |             | KHK      | ketohexokinase (fructokinase) [Source:HGNC Symbol;Acc:6315]                                      |
| IPI00448751 |             | KIAA1598 | KIAA1598 [Source:HGNC Symbol;Acc:29319]                                                          |
| IPI00604711 | KIF1A_HUMAN | KIF1A    | kinesin family member 1A [Source:HGNC Symbol;Acc:888]                                            |
| IPI00554498 | LDHC_HUMAN  | LDHC     | lactate dehydrogenase C [Source:HGNC Symbol;Acc:6544]                                            |
| IPI00016670 | LTOR1_HUMAN | LAMTOR1  | late endosomal/lysosomal adaptor, MAPK and MTOR activator 1 [Source:HGNC Symbol;Acc:26068]       |
| IPI00009750 | LEG4_HUMAN  | LGALS4   | lectin, galactoside-binding, soluble, 4 [Source:HGNC Symbol;Acc:6565]                            |
| IPI00788236 | LAIR1_HUMAN | LAIR1    | leukocyte-associated immunoglobulin-like receptor 1 [Source:HGNC Symbol;Acc:6477]                |
| IPI00017940 | LMBD2_HUMAN | LMBRD2   | LMBR1 domain containing 2 [Source:HGNC Symbol;Acc:25287]                                         |
| IPI00472013 | 1A31_HUMAN  | HLA-A    | major histocompatibility complex, class I, A [Source:HGNC Symbol;Acc:4931]                       |
| IPI00743503 | 1A26_HUMAN  | HLA-A    | major histocompatibility complex, class I, A [Source:HGNC Symbol;Acc:4931]                       |
| IPI00472057 | 1B73_HUMAN  | HLA-B    | major histocompatibility complex, class I, B [Source:HGNC Symbol;Acc:4932]                       |
| IPI00015988 | HLAG_HUMAN  | HLA-G    | major histocompatibility complex, class I, G [Source:HGNC Symbol;Acc:4964]                       |
| IPI00013400 | MMP7_HUMAN  | MMP7     | matrix metalloproteinase 7 (matrilysin, uterine) [Source:HGNC Symbol;Acc:7174]                   |
| IPI00167941 | MDN1_HUMAN  | MDN1     | MDN1, midasin homolog (yeast) [Source:HGNC Symbol;Acc:18302]                                     |
| IPI00004372 | MEP1A_HUMAN | MEP1A    | meprin A, alpha (PABA peptide hydrolase) [Source:HGNC Symbol;Acc:7015]                           |
| IPI00178015 | MEP1B_HUMAN | MEP1B    | meprin A, beta [Source:HGNC Symbol;Acc:7020]                                                     |
| IPI00103065 | MITD1_HUMAN | MITD1    | MIT, microtubule interacting and transport, domain containing 1 [Source:HGNC Symbol;Acc:25207]   |
| IPI00418221 | M3K6_HUMAN  | MAP3K6   | mitogen-activated protein kinase kinase kinase 6 [Source:HGNC Symbol;Acc:6858]                   |
| IPI00027201 | MUC2_HUMAN  | MUC2     | mucin 2, oligomeric mucus/gel-forming [Source:HGNC Symbol;Acc:7512]                              |

|             |             |          |                                                                                                            |
|-------------|-------------|----------|------------------------------------------------------------------------------------------------------------|
| IPI00028553 |             | MINPP1   | multiple inositol-polyphosphate phosphatase 1 [Source:HGNC Symbol;Acc:7102]                                |
| IPI00019190 | MYOC_HUMAN  | MYOC     | myocilin, trabecular meshwork inducible glucocorticoid response [Source:HGNC Symbol;Acc:7610]              |
| IPI00217493 | MYG_HUMAN   | MB       | myoglobin [Source:HGNC Symbol;Acc:6915]                                                                    |
| IPI00844172 |             | MYO6     | myosin VI [Source:HGNC Symbol;Acc:7605]                                                                    |
| IPI00023152 | NALDL_HUMAN | NAALADL1 | N-acetylated alpha-linked acidic dipeptidase-like 1 [Source:HGNC Symbol;Acc:23536]                         |
| IPI00220059 | NDUB4_HUMAN | NDUFB4   | NADH dehydrogenase (ubiquinone) 1 beta subcomplex, 4, 15kDa [Source:HGNC Symbol;Acc:7699]                  |
| IPI00009253 | SNAA_HUMAN  | NAPA     | N-ethylmaleimide-sensitive factor attachment protein, alpha [Source:HGNC Symbol;Acc:7641]                  |
| IPI00514877 |             | NCSTN    | nicastrin [Source:HGNC Symbol;Acc:17091]                                                                   |
| IPI00337541 | NNTM_HUMAN  | NNT      | nicotinamide nucleotide transhydrogenase [Source:HGNC Symbol;Acc:7863]                                     |
| IPI00451429 |             | NIF3L1   | NIF3 NGG1 interacting factor 3-like 1 (S. pombe) [Source:HGNC Symbol;Acc:13390]                            |
| IPI00017304 | NOS2_HUMAN  | NOS2     | nitric oxide synthase 2, inducible [Source:HGNC Symbol;Acc:7873]                                           |
| IPI00290416 | OLA1_HUMAN  | OLA1     | Obg-like ATPase 1 [Source:HGNC Symbol;Acc:28833]                                                           |
| IPI00742748 | OBSCN_HUMAN | OBSCN    | obscurin, cytoskeletal calmodulin and titin-interacting RhoGEF [Source:HGNC Symbol;Acc:15719]              |
| IPI00022324 | O2AG1_HUMAN | OR2AG1   | olfactory receptor, family 2, subfamily AG, member 1 [Source:HGNC Symbol;Acc:15142]                        |
| IPI00027720 | LIPP_HUMAN  | PNLIP    | pancreatic lipase [Source:HGNC Symbol;Acc:9155]                                                            |
| IPI00016387 | PCF11_HUMAN | PCF11    | PCF11, cleavage and polyadenylation factor subunit, homolog (S. cerevisiae) [Source:HGNC Symbol;Acc:30097] |
| IPI00641498 | PDZ1P_HUMAN | PDZK1    | PDZ domain containing 1 [Source:HGNC Symbol;Acc:8821]                                                      |
| IPI00641244 |             | PRDX1    | peroxiredoxin 1 [Source:HGNC Symbol;Acc:9352]                                                              |
| IPI00219568 | PGK2_HUMAN  | PGK2     | phosphoglycerate kinase 2 [Source:HGNC Symbol;Acc:8898]                                                    |
| IPI00021792 | PA21B_HUMAN | PLA2G1B  | phospholipase A2, group IB (pancreas) [Source:HGNC Symbol;Acc:9030]                                        |
| IPI00026962 | PA2GA_HUMAN | PLA2G2A  | phospholipase A2, group IIA (platelets, synovial fluid) [Source:HGNC Symbol;Acc:9031]                      |
| IPI00432412 |             |          | phospholipase inhibitor precursor [Source:RefSeq peptide;Acc:NP_001078943]                                 |
| IPI00789401 | PLSI_HUMAN  | PLS1     | plastin 1 [Source:HGNC Symbol;Acc:9090]                                                                    |
| IPI00007248 | PKHA6_HUMAN | PLEKHA6  | pleckstrin homology domain containing, family A member 6 [Source:HGNC Symbol;Acc:17053]                    |
| IPI00107555 |             | PFN2     | profilin 2 [Source:HGNC Symbol;Acc:8882]                                                                   |
| IPI00022213 | PEPC_HUMAN  | PGC      | progastricsin (pepsinogen C) [Source:HGNC Symbol;Acc:8890]                                                 |
| IPI00792533 |             | PGC      | progastricsin (pepsinogen C) [Source:HGNC Symbol;Acc:8890]                                                 |
| IPI00514208 |             | PTGDS    | prostaglandin D2 synthase 21kDa (brain)                                                                    |

|             |             |           |                                                                                                                    |
|-------------|-------------|-----------|--------------------------------------------------------------------------------------------------------------------|
| IPI00299571 |             | PDIA6     | [Source:HGNC Symbol;Acc:9592]<br>protein disulfide isomerase family A, member 6 [Source:HGNC Symbol;Acc:30168]     |
| IPI00010466 | KPCB_HUMAN  | PRKCB     | protein kinase C, beta [Source:HGNC Symbol;Acc:9395]                                                               |
| IPI00296337 | PRKDC_HUMAN | PRKDC     | protein kinase, DNA-activated, catalytic polypeptide [Source:HGNC Symbol;Acc:9413]                                 |
| IPI00332271 | PTPRS_HUMAN | PTPRS     | protein tyrosine phosphatase, receptor type, S [Source:HGNC Symbol;Acc:9681]                                       |
| IPI00290350 |             | PCDH19    | protocadherin 19 [Source:HGNC Symbol;Acc:14270]                                                                    |
| IPI00169326 | PPTC7_HUMAN | PPTC7     | PTC7 protein phosphatase homolog (S. cerevisiae) [Source:HGNC Symbol;Acc:30695]                                    |
| IPI00293327 | P2RX4_HUMAN | P2RX4     | purinergic receptor P2X, ligand-gated ion channel, 4 [Source:HGNC Symbol;Acc:8535]                                 |
| IPI00442204 | MGAL1_HUMAN |           | Putative maltase-glucoamylase-like protein FLJ16351 [Source:UniProtKB/Swiss-Prot;Acc:Q6ZN80]                       |
| IPI00024282 | RAB8B_HUMAN | RAB8B     | RAB8B, member RAS oncogene family [Source:HGNC Symbol;Acc:30273]                                                   |
| IPI00166044 | RPTOR_HUMAN | RPTOR     | regulatory associated protein of MTOR, complex 1 [Source:HGNC Symbol;Acc:30287]                                    |
| IPI00012622 | RHG20_HUMAN | ARHGAP20  | Rho GTPase activating protein 20 [Source:HGNC Symbol;Acc:18357]                                                    |
| IPI00152023 | RNS11_HUMAN | RNASE11   | ribonuclease, RNase A family, 11 (non-active) [Source:HGNC Symbol;Acc:19269]                                       |
| IPI00219153 | RL22_HUMAN  | RPL22     | ribosomal protein L22 [Source:HGNC Symbol;Acc:10315]                                                               |
| IPI00030179 | RL7_HUMAN   | RPL7      | ribosomal protein L7 [Source:HGNC Symbol;Acc:10363]                                                                |
| IPI00745789 | RSSA_HUMAN  | RPSA      | ribosomal protein SA [Source:HGNC Symbol;Acc:6502]                                                                 |
| IPI00171771 | RFWD2_HUMAN | RFWD2     | ring finger and WD repeat domain 2 [Source:HGNC Symbol;Acc:17440]                                                  |
| IPI00433279 | SLFN5_HUMAN | SLFN5     | schlafen family member 5 [Source:HGNC Symbol;Acc:28286]                                                            |
| IPI00002606 | ADSV_HUMAN  | SCIN      | scinderin [Source:HGNC Symbol;Acc:21695]                                                                           |
| IPI00030385 | SBP1_HUMAN  | SELENBP1  | selenium binding protein 1 [Source:HGNC Symbol;Acc:10719]                                                          |
| IPI00033583 | SPB12_HUMAN | SERPINB12 | serpin peptidase inhibitor, clade B (ovalbumin), member 12 [Source:HGNC Symbol;Acc:14220]                          |
| IPI00307466 |             | SERPINB3  | serpin peptidase inhibitor, clade B (ovalbumin), member 3 [Source:HGNC Symbol;Acc:10569]                           |
| IPI00413451 | SPB6_HUMAN  | SERPINB6  | serpin peptidase inhibitor, clade B (ovalbumin), member 6 [Source:HGNC Symbol;Acc:8950]                            |
| IPI00394753 | NRAM2_HUMAN | SLC11A2   | solute carrier family 11 (proton-coupled divalent metal ion transporters), member 2 [Source:HGNC Symbol;Acc:10908] |
| IPI00008616 | S12A7_HUMAN | SLC12A7   | solute carrier family 12 (potassium/chloride transporters), member 7 [Source:HGNC Symbol;Acc:10915]                |
| IPI00011981 | S13A2_HUMAN | SLC13A2   | solute carrier family 13 (sodium-dependent dicarboxylate transporter), member 2 [Source:HGNC Symbol;Acc:10917]     |

|             |             |          |                                                                                                                                                                                         |
|-------------|-------------|----------|-----------------------------------------------------------------------------------------------------------------------------------------------------------------------------------------|
| IPI00020542 | S22AB_HUMAN | SLC22A11 | solute carrier family 22 (organic anion/urate transporter), member 11 [Source:HGNC Symbol;Acc:18120]                                                                                    |
| IPI00171334 | S22A4_HUMAN | SLC22A4  | solute carrier family 22 (organic cation/ergothioneine transporter), member 4 [Source:HGNC Symbol;Acc:10968]                                                                            |
| IPI00029268 | SLC31_HUMAN | SLC3A1   | solute carrier family 3 (cystine, dibasic and neutral amino acid transporters, activator of cystine, dibasic and neutral amino acid transport), member 1 [Source:HGNC Symbol;Acc:11025] |
| IPI00024248 | SC5A5_HUMAN | SLC5A5   | solute carrier family 5 (sodium iodide symporter), member 5 [Source:HGNC Symbol;Acc:11040]                                                                                              |
| IPI00760881 | SC5AC_HUMAN | SLC5A12  | solute carrier family 5 (sodium/glucose cotransporter), member 12 [Source:HGNC Symbol;Acc:28750]                                                                                        |
| IPI00003527 | NHRF1_HUMAN | SLC9A3R1 | solute carrier family 9 (sodium/hydrogen exchanger), member 3 regulator 1 [Source:HGNC Symbol;Acc:11075]                                                                                |
| IPI00217882 | SORT_HUMAN  | SORT1    | sortilin 1 [Source:HGNC Symbol;Acc:11186]                                                                                                                                               |
| IPI00657938 |             | SNX18    | sorting nexin 18 [Source:HGNC Symbol;Acc:19245]                                                                                                                                         |
| IPI00178767 | ASM3A_HUMAN | SMPDL3A  | sphingomyelin phosphodiesterase, acid-like 3A [Source:HGNC Symbol;Acc:17389]                                                                                                            |
| IPI00291643 | SPRY4_HUMAN | SPRYD4   | SPRY domain containing 4 [Source:HGNC Symbol;Acc:27468]                                                                                                                                 |
| IPI00000001 | STAU1_HUMAN | STAU1    | staufen, RNA binding protein, homolog 1 (Drosophila) [Source:HGNC Symbol;Acc:11370]                                                                                                     |
| IPI00719690 | SAM9L_HUMAN | SAMD9L   | sterile alpha motif domain containing 9-like [Source:HGNC Symbol;Acc:1349]                                                                                                              |
| IPI00514755 |             | SDF4     | stromal cell derived factor 4 [Source:HGNC Symbol;Acc:24188]                                                                                                                            |
| IPI00032826 | ST134_HUMAN | ST13     | suppression of tumorigenicity 13 (colon carcinoma) (Hsp70 interacting protein) [Source:HGNC Symbol;Acc:11343]                                                                           |
| IPI00335277 | SYPL1_HUMAN | SYPL1    | synaptophysin-like 1 [Source:HGNC Symbol;Acc:11507]                                                                                                                                     |
| IPI00289876 | STX7_HUMAN  | STX7     | syntaxin 7 [Source:HGNC Symbol;Acc:11442]                                                                                                                                               |
| IPI00642310 |             | STXBP2   | syntaxin binding protein 2 [Source:HGNC Symbol;Acc:11445]                                                                                                                               |
| IPI00298994 | TLN1_HUMAN  | TLN1     | talin 1 [Source:HGNC Symbol;Acc:11845]                                                                                                                                                  |
| IPI00183938 | TTC27_HUMAN | TTC27    | tetratricopeptide repeat domain 27 [Source:HGNC Symbol;Acc:25986]                                                                                                                       |
| IPI00290452 | TMBI1_HUMAN | TMBIM1   | transmembrane BAX inhibitor motif containing 1 [Source:HGNC Symbol;Acc:23410]                                                                                                           |
| IPI00023788 | ENTK_HUMAN  | TMPRSS15 | transmembrane protease, serine 15 [Source:HGNC Symbol;Acc:9490]                                                                                                                         |
| IPI00010252 | TRI33_HUMAN | TRIM33   | tripartite motif containing 33 [Source:HGNC Symbol;Acc:16290]                                                                                                                           |
| IPI00018511 | TBB8B_HUMAN |          | Tubulin beta-8 chain B [Source:UniProtKB/Swiss-Prot;Acc:A6NNZ2]                                                                                                                         |
| IPI00179709 | TBA3C_HUMAN | TUBA3C   | tubulin, alpha 3c [Source:HGNC Symbol;Acc:12408]                                                                                                                                        |
| IPI00179709 | TBA3C_HUMAN | TUBA3D   | tubulin, alpha 3d [Source:HGNC Symbol;Acc:24071]                                                                                                                                        |



|             |             |         |                                                                                                                         |
|-------------|-------------|---------|-------------------------------------------------------------------------------------------------------------------------|
| IPI00640721 | 1433B_HUMAN | YWHAB   | tyrosine 3-monooxygenase/tryptophan 5-monooxygenase activation protein, beta polypeptide [Source:HGNC Symbol;Acc:12849] |
| IPI00011245 | UBP29_HUMAN | USP29   | ubiquitin specific peptidase 29 [Source:HGNC Symbol;Acc:18563]                                                          |
| IPI00783859 |             | VPS13D  | vacuolar protein sorting 13 homolog D (S. cerevisiae) [Source:HGNC Symbol;Acc:23595]                                    |
| IPI00031655 | VPS25_HUMAN | VPS25   | vacuolar protein sorting 25 homolog (S. cerevisiae) [Source:HGNC Symbol;Acc:28122]                                      |
| IPI00423568 | RASK_HUMAN  | KRAS    | v-Ki-ras2 Kirsten rat sarcoma viral oncogene homolog [Source:HGNC Symbol;Acc:6407]                                      |
| IPI00642108 |             | WDR45   | WD repeat domain 45 [Source:HGNC Symbol;Acc:28912]                                                                      |
| IPI00550192 | XPP3_HUMAN  | XPNPEP3 | X-prolyl aminopeptidase (aminopeptidase P) 3, putative [Source:HGNC Symbol;Acc:28052]                                   |
| IPI00014513 | TYY1_HUMAN  | YY1     | YY1 transcription factor [Source:HGNC Symbol;Acc:12856]                                                                 |
| IPI00743220 | ZN561_HUMAN | ZNF561  | zinc finger protein 561 [Source:HGNC Symbol;Acc:28684]                                                                  |

## **Supp. Table 2: Processed proteomics data.**

Raw data are available at the Peptide Atlas Repository  
(<http://www.peptideatlas.org/PASS/PASS00104>)

Processed data are supplied as separate file "emmm\_201201494\_sm\_supptable\_2.xlsx"

**Supp. Table 3: Meprin A and Filamin C are significantly elevated in urine of patients with KD**

| Urine Marker                           | Non-Kawasaki disease          | Kawasaki disease            |
|----------------------------------------|-------------------------------|-----------------------------|
| Filamin C (ng/ml)                      | 3.7 ± 3.0 <sup>a, b</sup>     | 19.2 ± 12.1 <sup>a, b</sup> |
| Filamin C (ng/ml) / creatinine (mg/ml) | 0.056 ± 0.065 <sup>a, b</sup> | 2.2 ± 11 <sup>a, b</sup>    |
| Meprin A (ng/ml)                       | 5.6 ± 5.7 <sup>a, b</sup>     | 50.2 ± 24.4 <sup>a, b</sup> |
| Meprin A (ng/ml) / creatinine (mg/ml)  | 0.10 ± 0.15 <sup>a, b</sup>   | 1.5 ± 1.2 <sup>a, b</sup>   |

Values in table represent mean ± standard deviation of untransformed measurements; statistical comparisons were carried out using analyses of log-transformed measurements. <sup>a</sup>  $p < 0.05$  versus Kawasaki disease group, <sup>b</sup>  $p < 0.05$  versus Kawasaki disease group.

**Supp. Table 4: Meprin A and Filamin C are significantly elevated in serum of patients with KD**

| Serum Marker      | Non-Kawasaki disease       | Kawasaki disease |
|-------------------|----------------------------|------------------|
| Filamin C (ng/ml) | 6.6 ± 5.8 <sup>a, b</sup>  | 216.6 ± 707.8    |
| Meprin A (ng/ml)  | 14.8 ± 9.1 <sup>a, b</sup> | 1362.8 ± 3587.1  |

Values in table represent mean ± standard deviation of untransformed measurements; statistical comparisons were carried out using analyses of log-transformed measurements. <sup>a</sup>  $p < 0.05$  versus Kawasaki disease group, <sup>b</sup>  $p < 0.05$  versus Kawasaki disease group.

**Supp. Fig. 1: Urine protein concentration (top) and creatinine concentration (bottom) in patients with and without KD.** Urine protein concentration were measured using clinical urinalysis (0, 1, 2, 3).

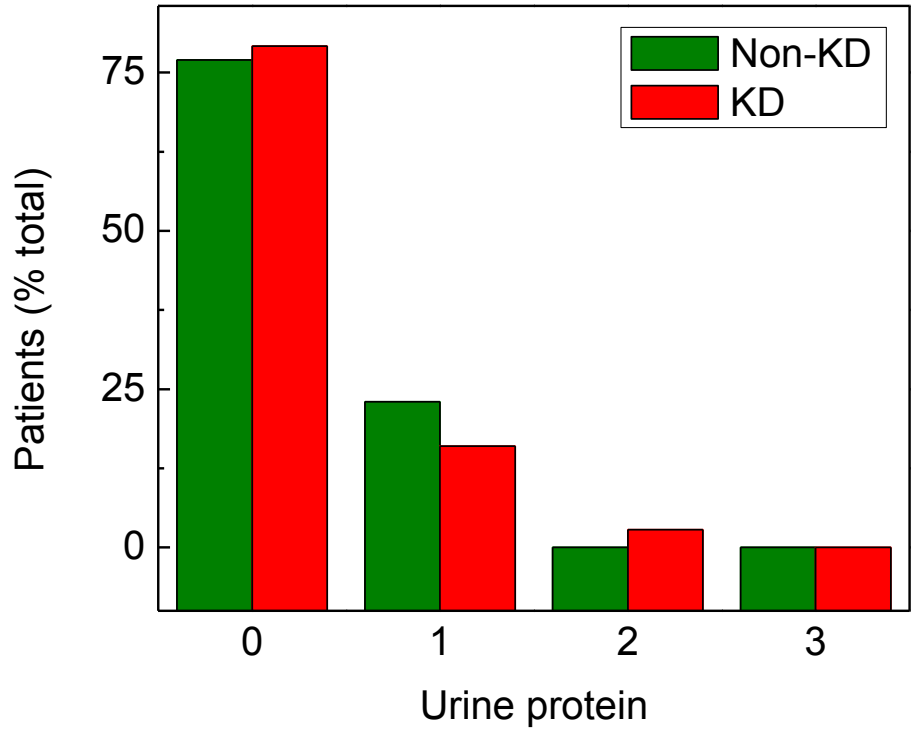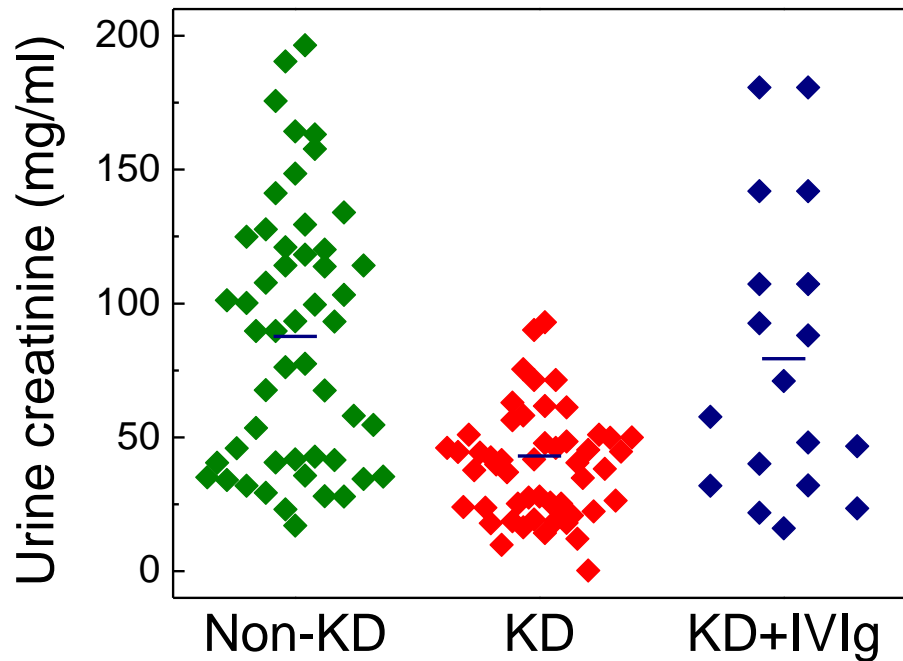

**Supp. Fig. 2: Urine meprin A levels in KD patients with and without pyuria.** Patients with Kawasaki disease who had <10 white blood cells per high-power field (WBC/hpf, no pyuria) have similar urine meprin A concentrations as those with >10 WBC/hpf (pyuria).  $p > 0.15$ .

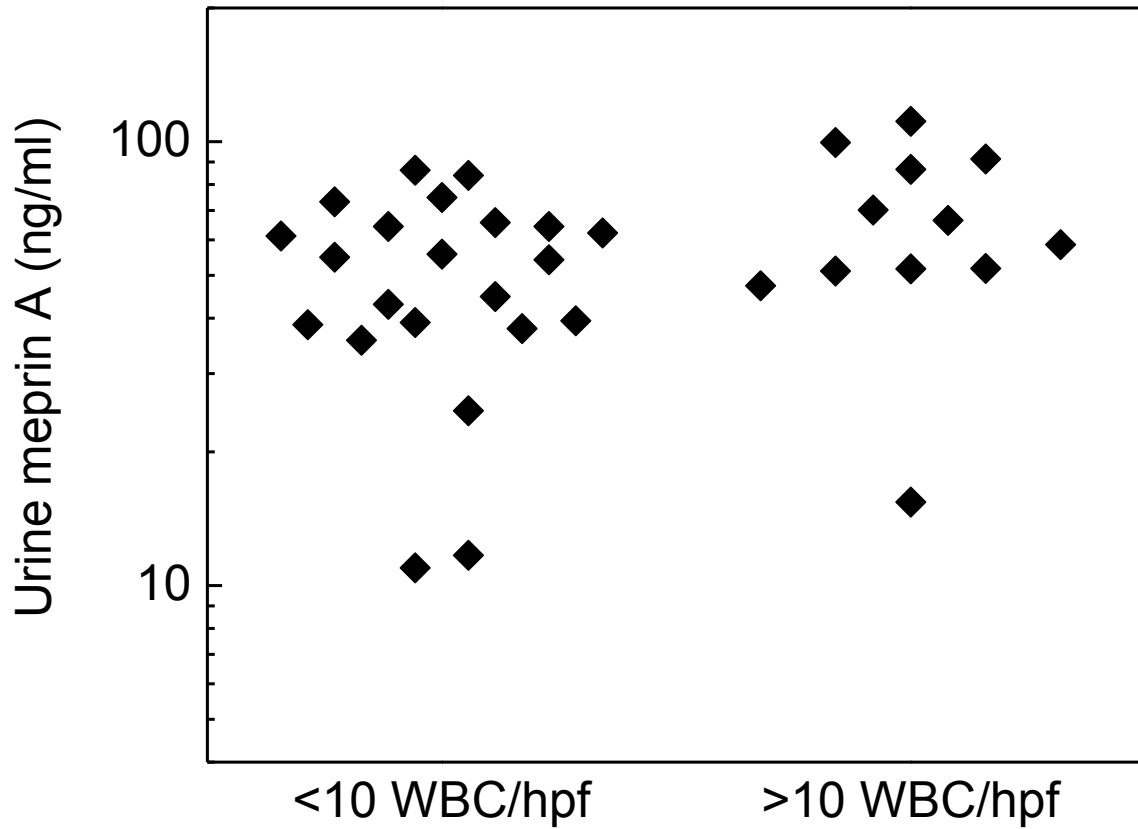

**Supp. Fig. 3: Urine filamin C levels in patients suspected of Kawasaki disease as a function of their C-reactive protein levels.**

Urine filamin C levels do not correlate with blood C-reactive protein levels. Adjusted  $r^2 < 0.03$ .

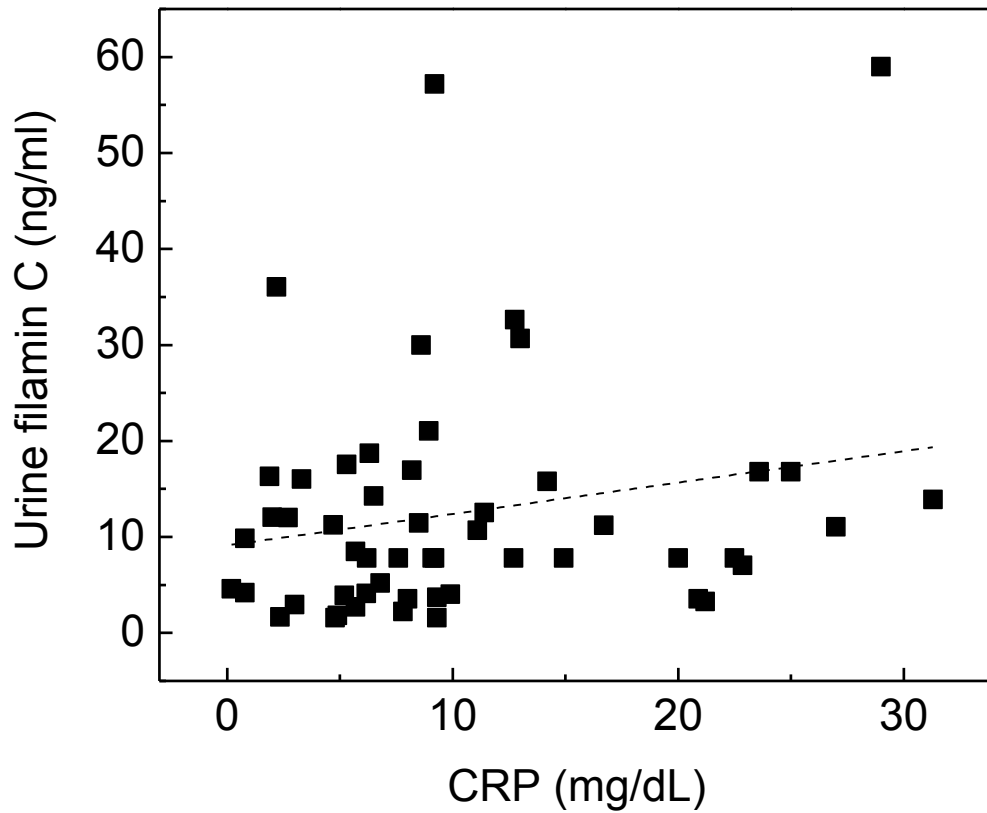

**Supp. Fig. 4: Urine meprin A levels in patients suspected of Kawasaki disease as a function of their C-reactive protein levels.**  
Urine meprin A levels do not correlate with blood C-reactive protein levels. Adjusted  $r^2 < 0.03$ .

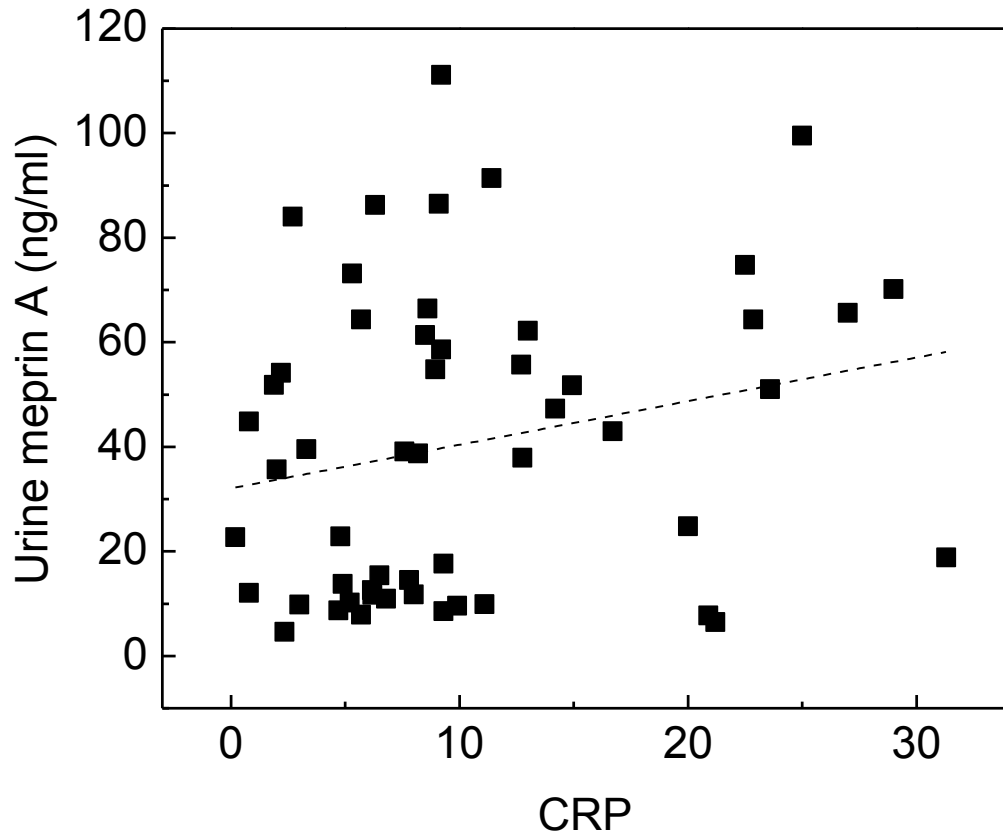

**Supp. Fig. 5: Urine filamin C levels in patients suspected of Kawasaki disease as a function of their erythrocyte sedimentation rates.** Urine filamin C levels do not correlate with ESR levels. Adjusted  $r^2 < 0.01$ .

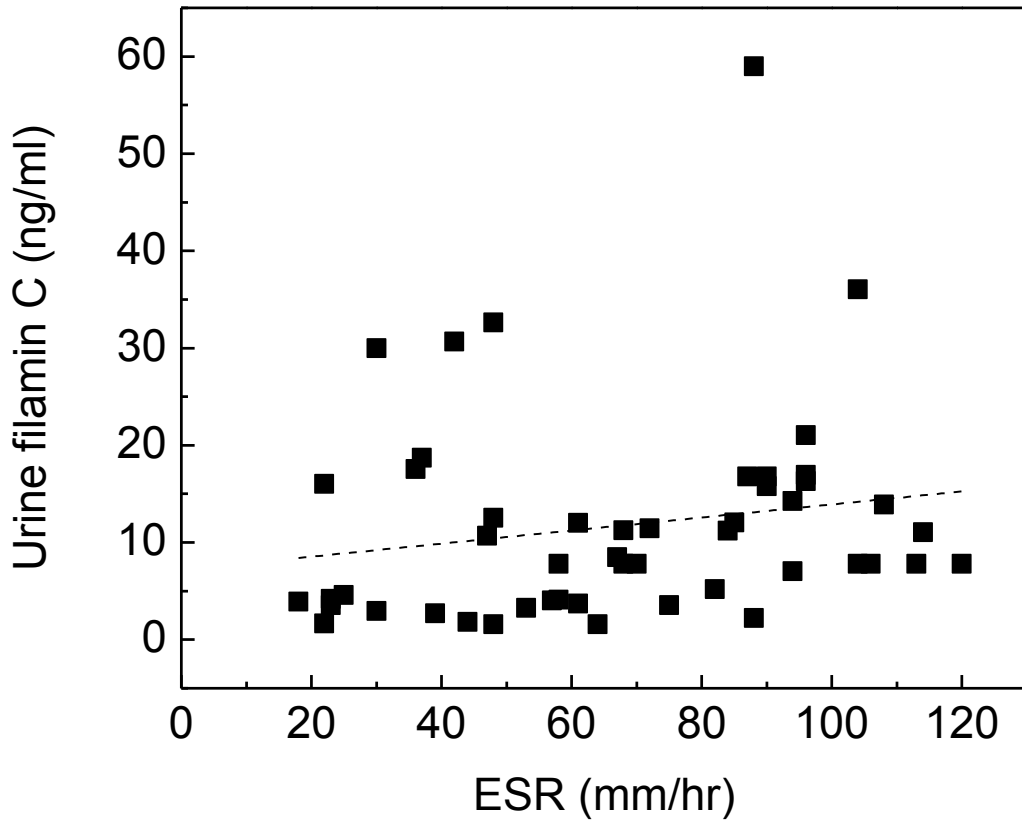



**Supp. Fig. 6: Urine meprin A levels in patients suspected of Kawasaki disease as a function of their erythrocyte sedimentation rates.** Urine meprin A levels do not correlate with ESR levels. Adjusted  $r^2 < 0.05$ .

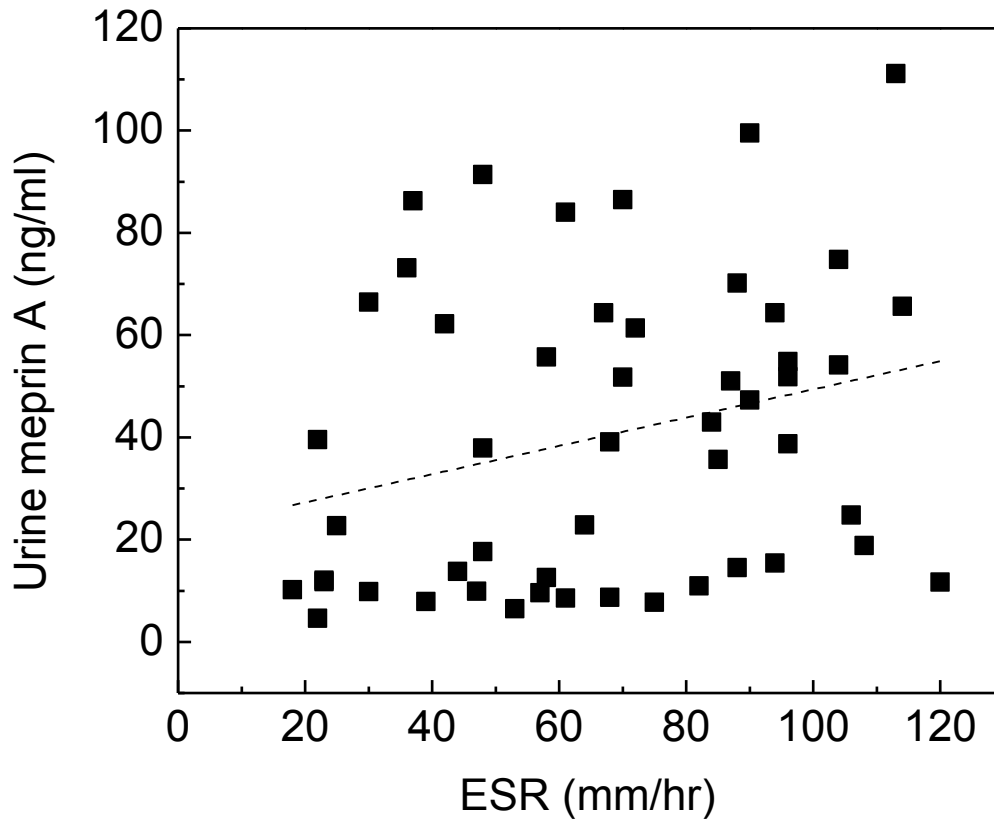

Supplement: emmm0005-0210-SD2.pdf [file emmm0005-0210-SD2.pdf]
